# Supplementary material
Source: PubMed Central journal article supplement (PMC2652733)
Supplement: NIHMS93013-supplement-1_si_001.pdf [file NIHMS93013-supplement-1_si_001.pdf]

## SUPPORTING INFORMATION

---

### Compared to Purpurinimides, the Pyropheophorbide Containing an Iodobenzyl Group showed Enhanced PDT Efficacy and Tumor Imaging ( $^{124}\text{I}$ -PET) Ability

Suresh K. Pandey<sup>1</sup>, Munawwar Sajjad<sup>3,\*</sup>, Yihui Chen<sup>1</sup>, Anupam Pandey<sup>1,¶</sup>  
Joseph R. Missert<sup>1</sup>, Carrie Batt<sup>1</sup>, Rutao Yao<sup>3</sup>, Hani A. Nabi<sup>3</sup>,  
Allan R. Oseroff<sup>2</sup> and Ravindra K. Pandey<sup>1,\*</sup>

<sup>1</sup>PDT Center, Cell Stress Biology and <sup>2</sup>Department of Dermatology  
Roswell Park Cancer Institute, Buffalo, NY 14263  
<sup>3</sup>Department of Nuclear Medicine,  
State University of New York, Buffalo, NY 14214

---

#### **Contents:**

- S1: Title page
- S2: NMR spectrum of compound **10**
- S3: NMR spectrum of compound **11**
- S4: NMR spectrum of compound **5**
- S5: NMR spectrum of compound **7**
- S6: NMR spectrum of compound **4**
- S7: NMR spectrum of compound **6**
- S8: HPLC chromatogram of compound **1**
- S9: HPLC chromatogram of compound **4**
- S10: HPLC chromatogram of compound **5**
- S11: HPLC chromatogram of compound **10**
- S12: HPLC chromatograms of I-124 labeled compounds **8, 9** and **12**.

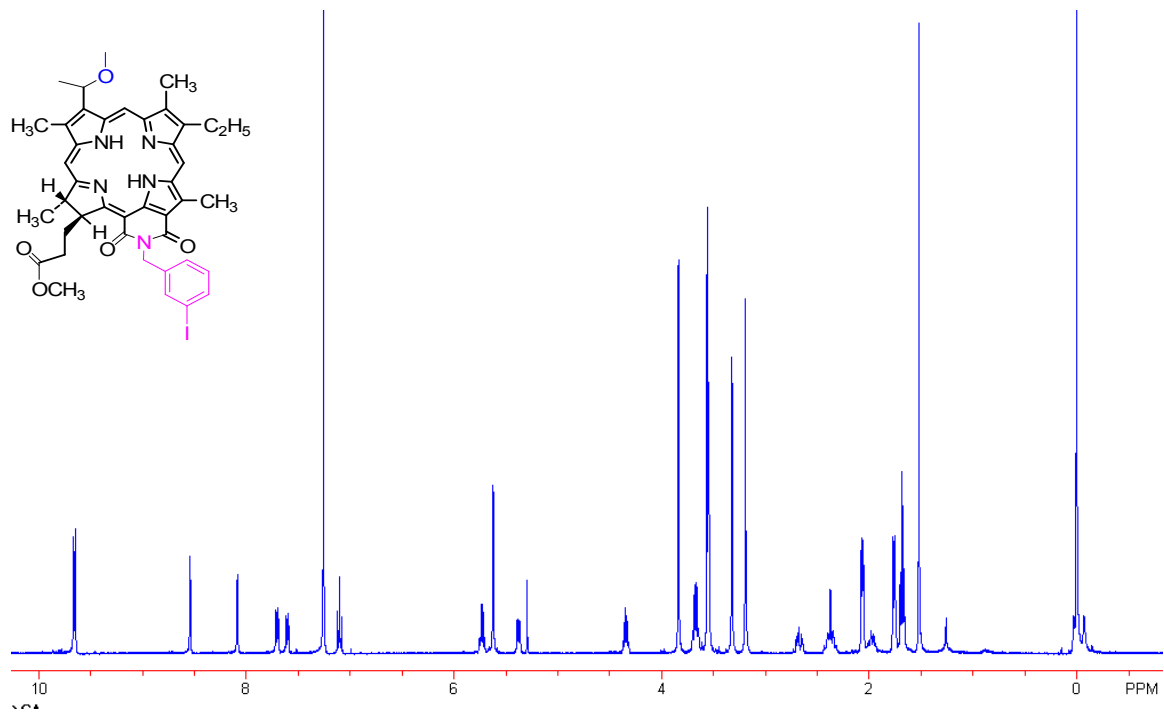

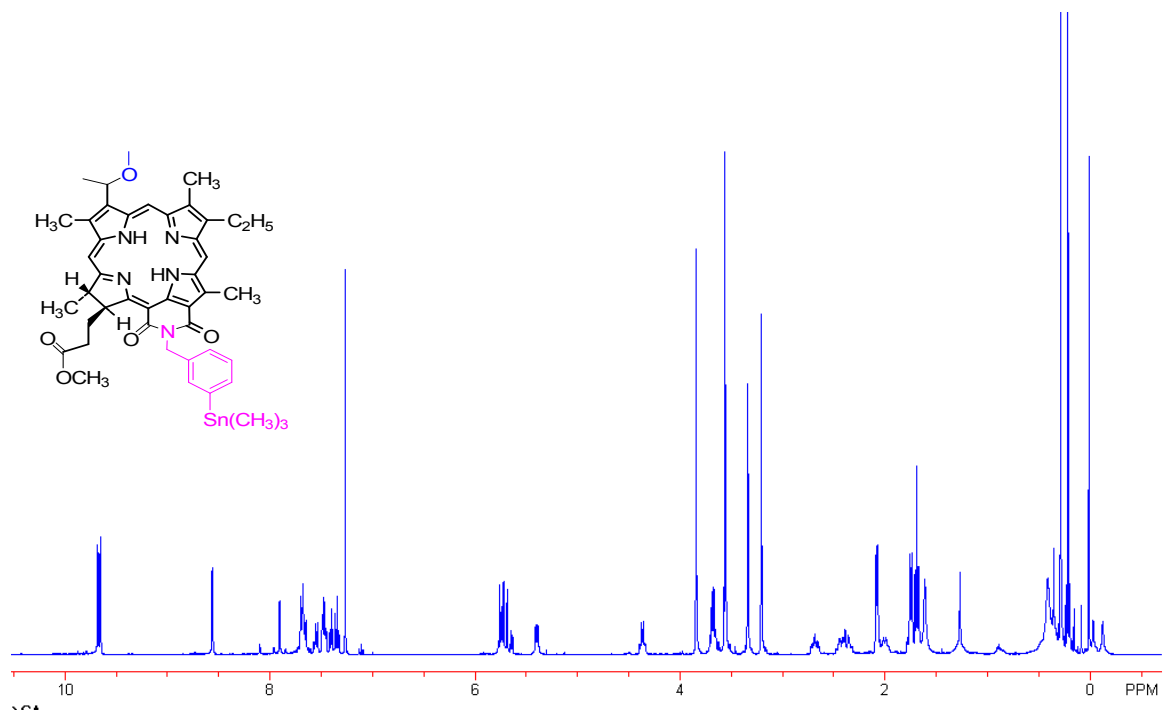

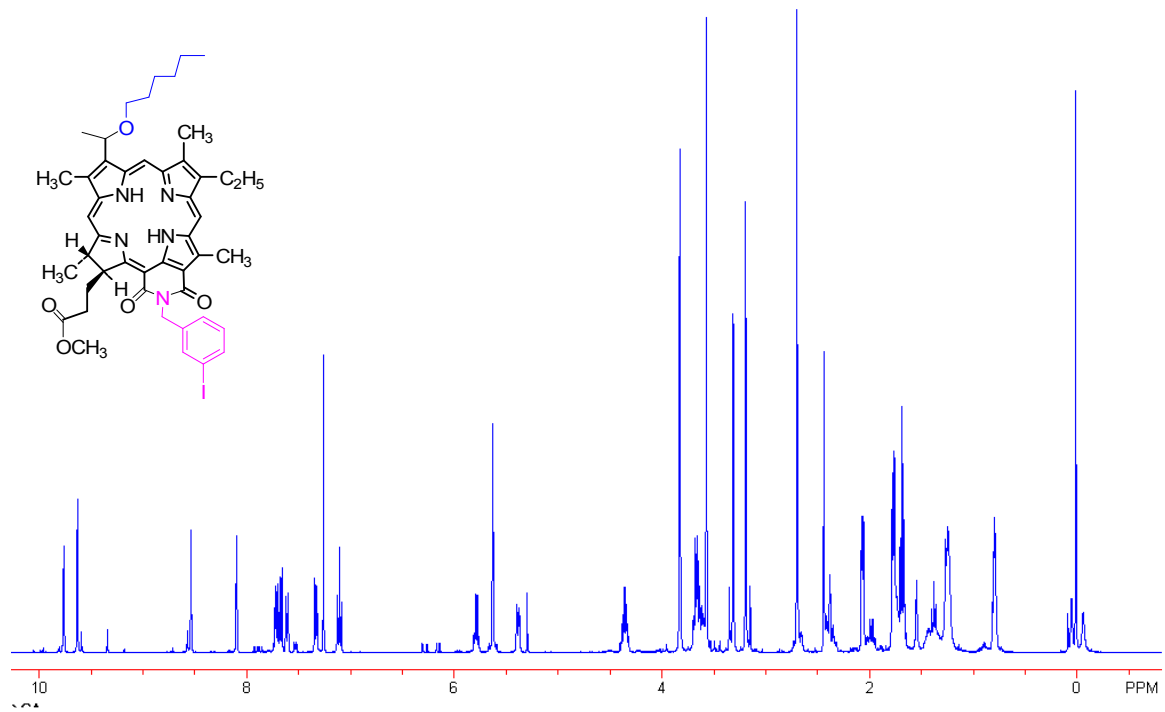

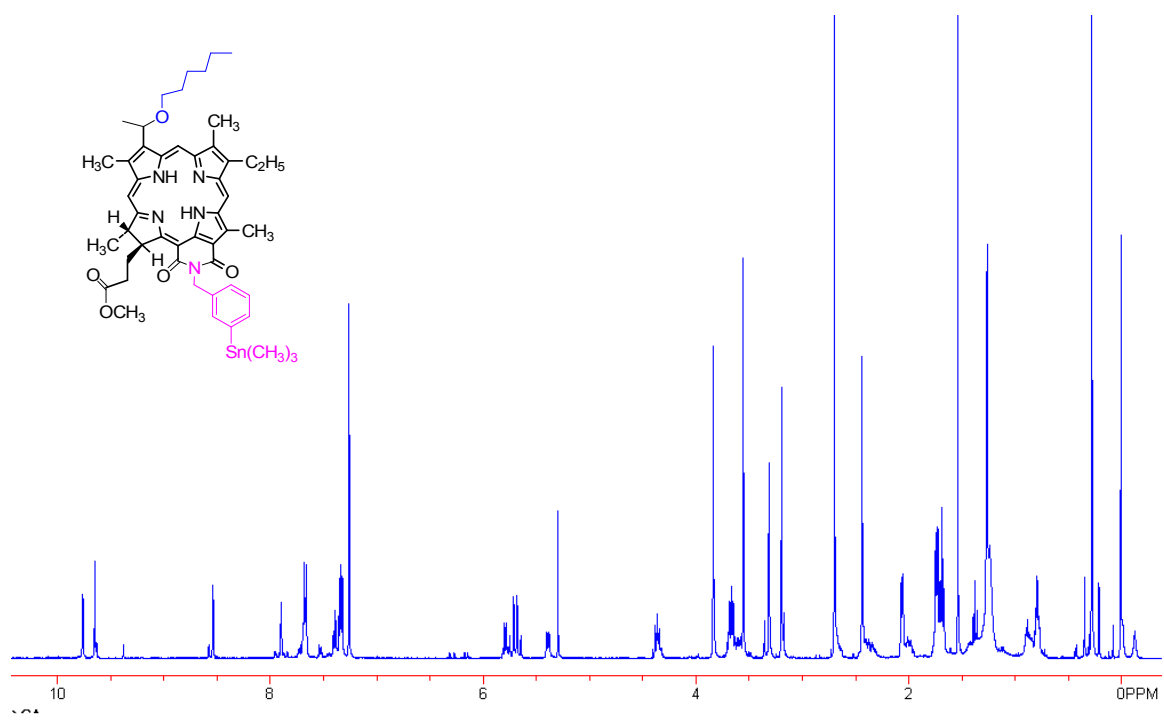

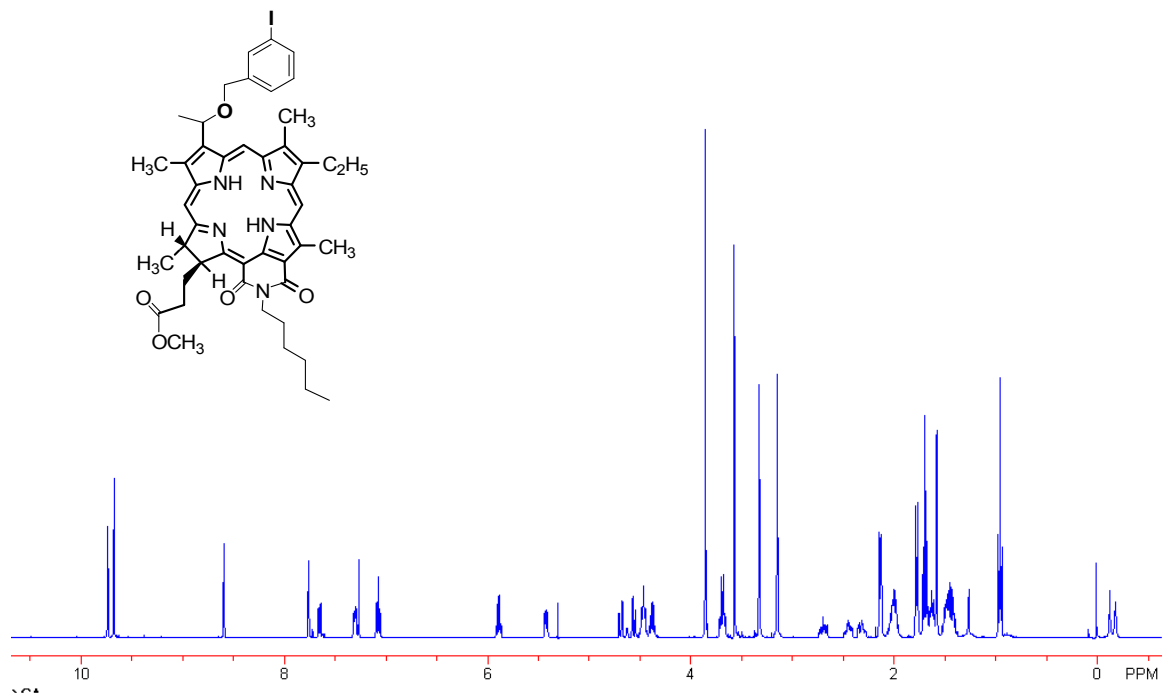

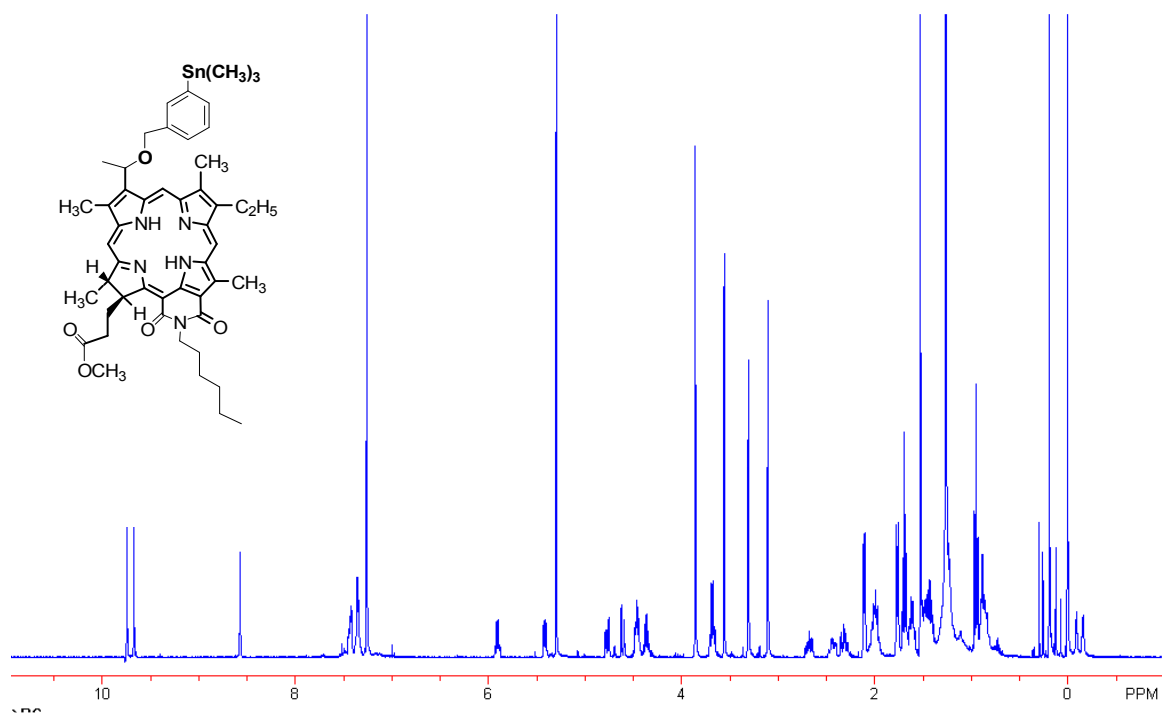

HPLC system: Waters (Milford, MA) system including waters 600 Controller, Delta 600 pump and 996 Photodiode Array Detector was used. Reverse phase, Symmetry<sup>®</sup> C18, 5  $\mu$ m, 4.6 x 150 mm column was used under isocratic setting. The eluting solvent for all the compounds is pure MeOH.

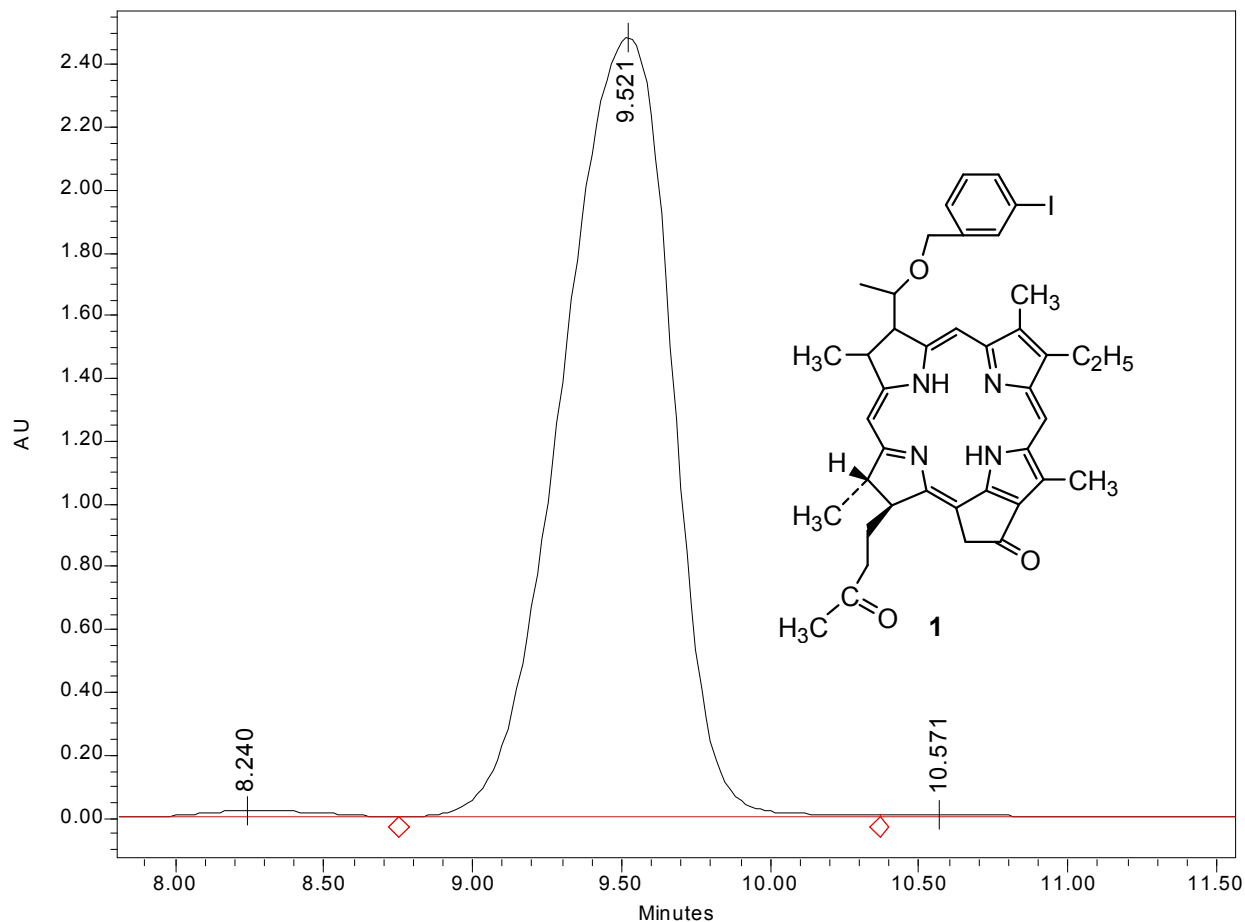



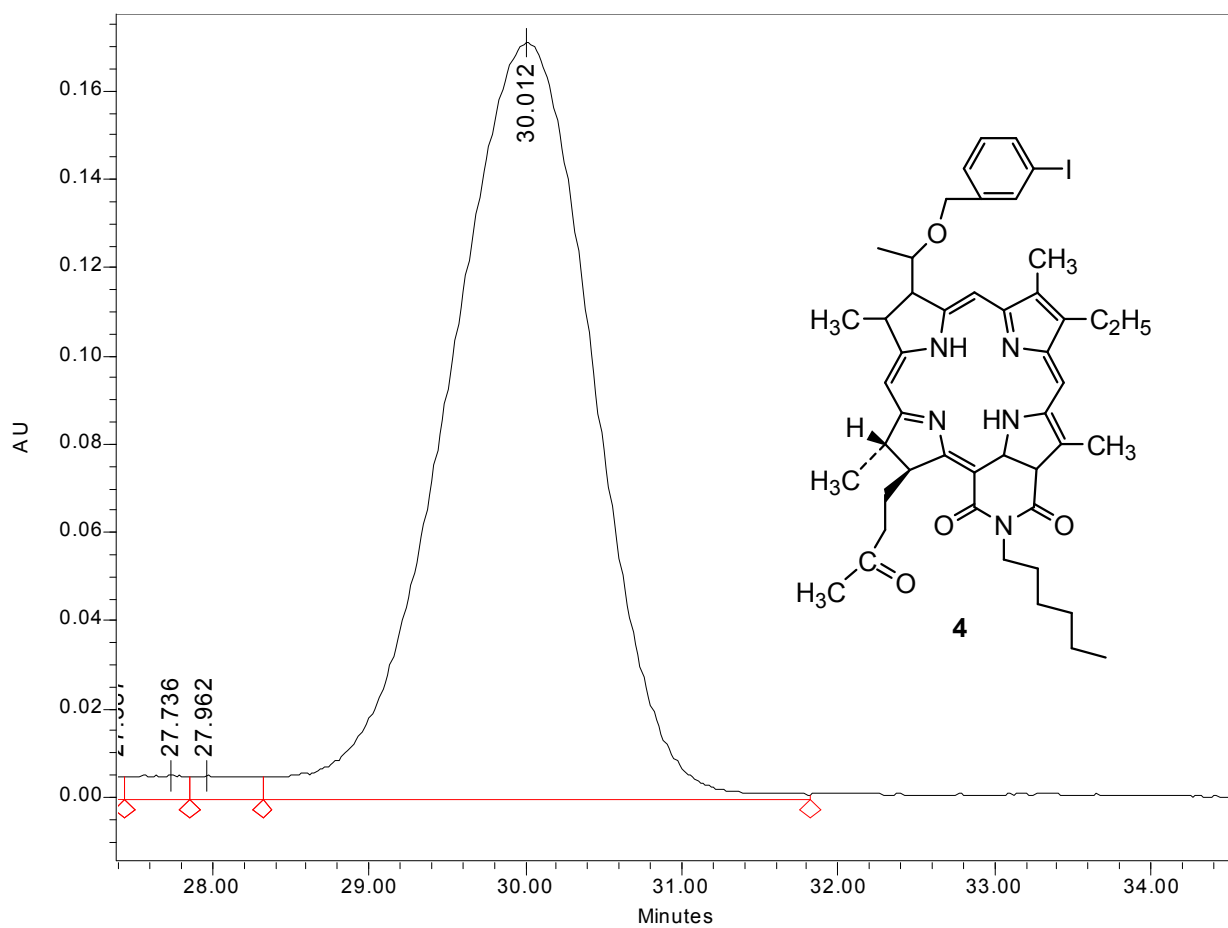

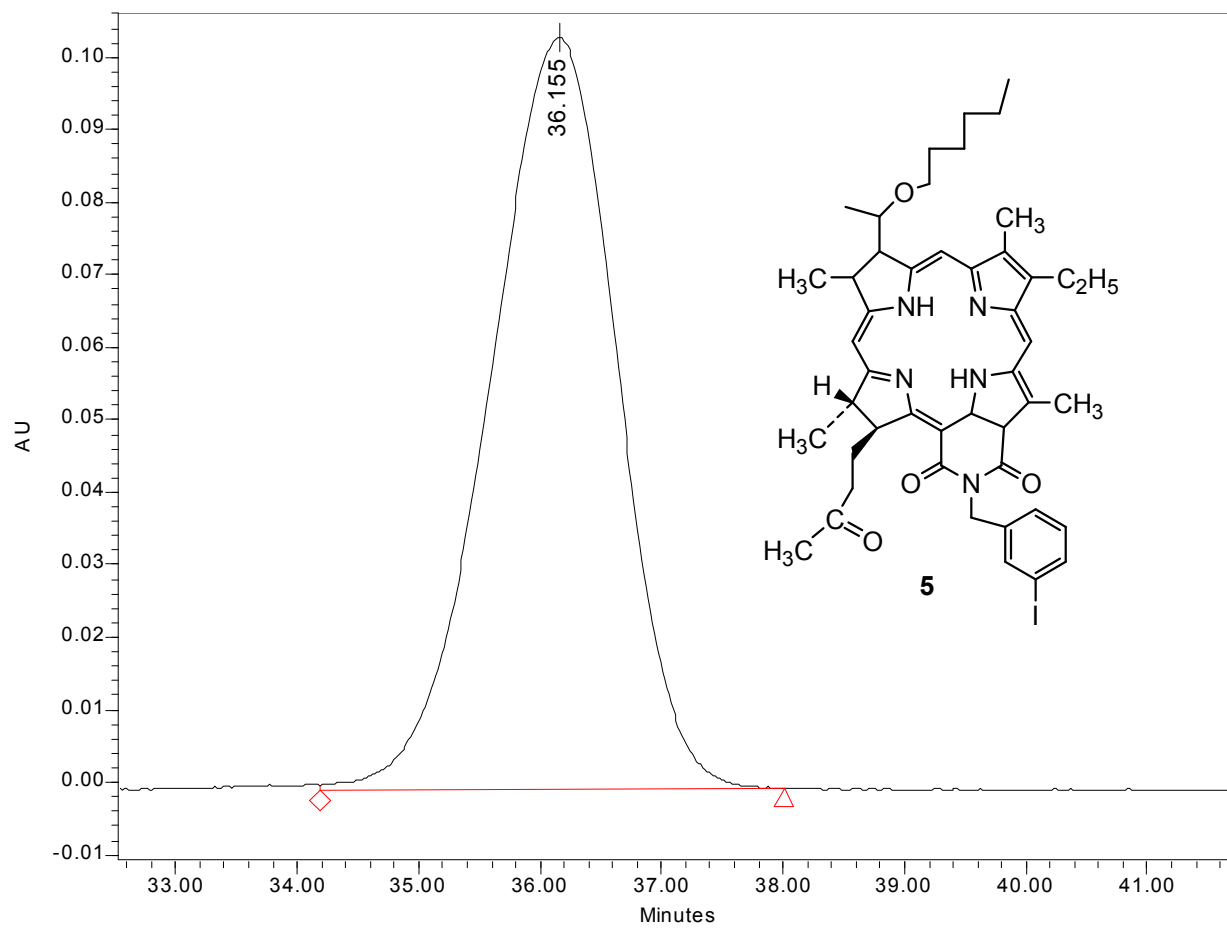

**S10**

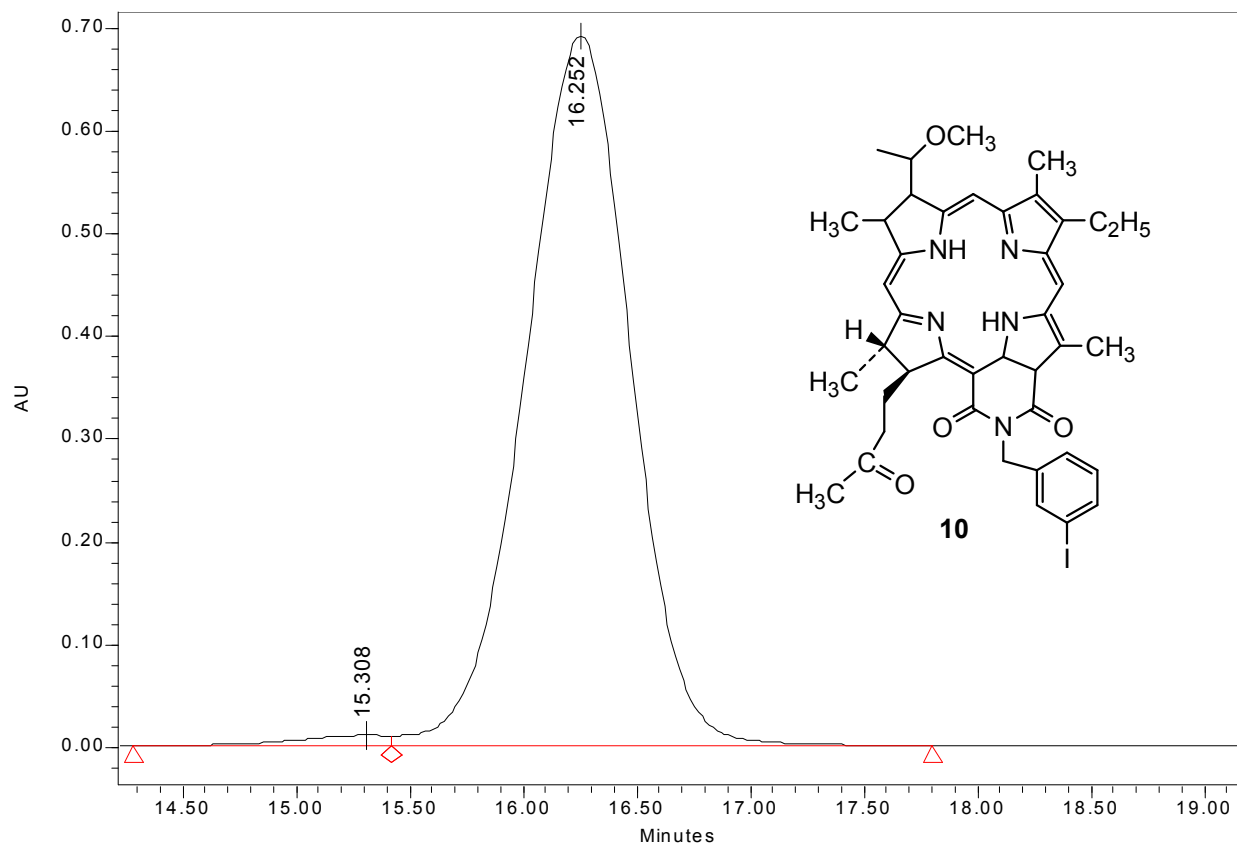

S11

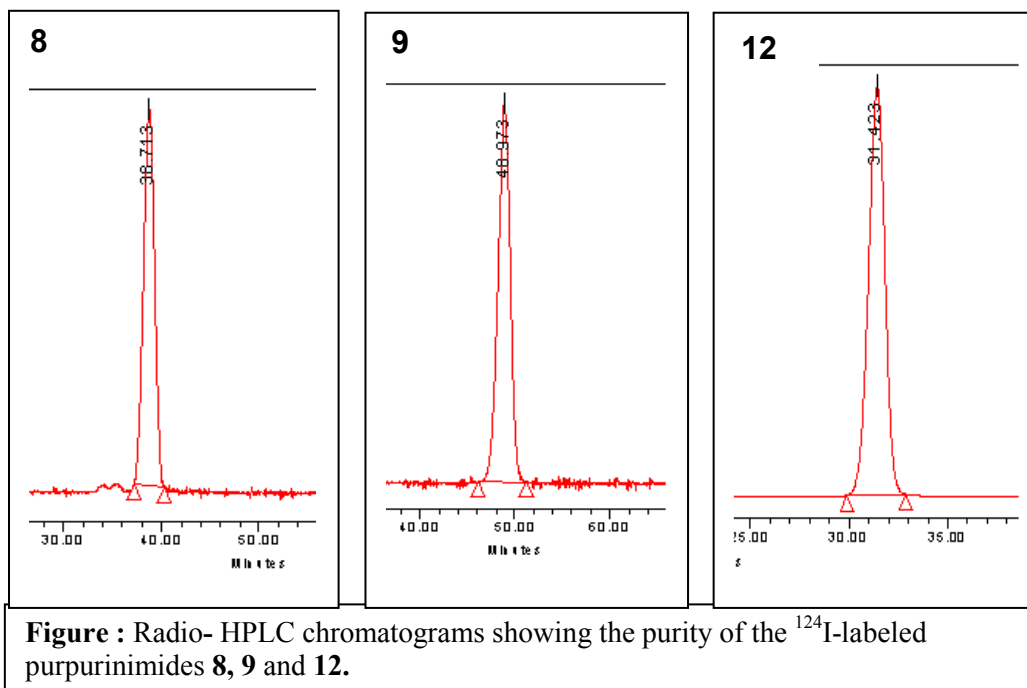

*Note:*

The difference in the retention times between the labeled and non-labeled compounds is due to the difference of the size of the HPLC column and the polarity of the eluting solvents.
